# Supplementary material for: IgD shapes the pre-immune naïve B cell compartment in humans
Source: PubMed Central journal article supplement (PMC9908586; doi:10.3389/fimmu.2023.1096019), 2023-01-26
Supplement: DataSheet_1.pdf [file DataSheet_1.pdf]

## *Supplementary Material*

### **1 Supplementary Methods**

The following antibodies were used for flow cytometric analysis and sorting: FITC anti-human IgD (polyclonal, Caltag), PE or PE-Cy7 anti-human IgD (clone IA6-2, Biolegend), Brilliant violet 421 anti-human IgM (clone MHM-88, Biolegend), PE anti-human kappa (polyclonal, DAKO), FITC anti-human lambda polyclonal, DAKO), PE-Cy7 anti-human CD10 (clone HI10a, Biolegend), APC-Cy7 anti-human CD19 (clone HIB19, Biolegend), PE-Cy7 anti-human CD20 (clone 2H7), APC anti-human CD21 (Bu32), FITC anti-human CD22 (S-HCL-1, Biolegend), FITC anti-human CD24 (clone ML5, Biolegend), PerCP-Cy5.5 anti-human CD27 (M-T271, Biolegend), PerCP-Cy5.5 anti-human CD34 (clone 561, Biolegend), FITC or Brilliant Violet 421 anti-human CD38 (HIT2, Biolegend), PE anti-human CD40 (clone 5C3, Biolegend), PE-Cy7 anti-human CD69 (clone FN50, Biolegend), APC anti-human CD86 (clone IT2.2, Biolegend), PE anti-human HLA-DR (clone 1.243, Biolegend), FITC anti-human BAFF-R (clone 11C1, Biolegend), PE anti-human TACI (clone 1A1, Biolegend), PE anti-human CXCR4 (clone QA18A64, Biolegend), APC anti-human integrin  $\beta$  (clone FIB504, Biolegend).

## 2 Supplementary Tables

Table S1 – Immunological parameters in individuals carrying a heterozygous IGHD variant

|                     | <b>K1-I.1</b> | <b>K1-II.2</b> | <b>K1-II.3</b> | <b>K1-III.1</b> | <b>K1-III.3</b> | <b>K2-I.1</b> | <b>K2-II.1</b>     | <b>K3-II.1</b> |
|---------------------|---------------|----------------|----------------|-----------------|-----------------|---------------|--------------------|----------------|
| Age (years) / sex   | 65 / male     | 42 / female    | 38 / male      | 8 / female      | 5 / female      | 63 / male     | 32 / male          | 9 / male       |
| Disease             | healthy       | healthy        | healthy        | healthy         | CVID            | healthy       | Hodgkin`s lymphoma | healthy        |
| IGHD variant        | p.P6L         | p.P6L          | p.P6L          | p.P6L           | p.P6L           | p.C15VfsX21   | p.C15VfsX21        | p.L328PfsX389  |
| WBC (/μl)           | 5,850         | 7,980          | 8,570          | 6,790           | 13,300          | n.a.          | 3,000 (-)          | 7.650          |
| Lymphocytes (/μl)   | 1,790         | 2,100          | 2,190          | 2,320           | 3,830           | n.a.          | 1,220 (-)          | 2.600          |
| CD3+ (%)            | 59.3          | 78.3           | 62.2           | 73.9            | 64.4            | n.a.          | 62.6               | 76.1           |
| CD3+ (/μl)          | 1,062         | 1650           | 1,359          | 1716            | 2166            | n.a.          | 759 (-)            | 1,985          |
| CD3+CD4+ (%)        | 43.6          | 50.5           | 45.2           | 33.6            | 33.6            | n.a.          | 28.7               | 49.5           |
| CD3+CD4+ (/μl)      | 780           | 1064           | 987            | 779             | 1,131           | n.a.          | 347 (-)            | 1,292          |
| CD3+CD8+ (%)        | 10.2          | 22.6           | 14.6           | 30.4            | 25.4            | n.a.          | 27.9               | 21.4           |
| CD3+CD8+ (/μl)      | 183           | 475            | 319            | 705             | 856             | n.a.          | 338 (-)            | 558            |
| CD3-CD56+ (%)       | 33.4          | 12.1           | 27.2 (+)       | 14.7            | 9.2             | n.a.          | 27.6               | 2.4            |
| CD3-CD56+ (/μl)     | 597           | 255            | 604 (+)        | 342             | 614             | n.a.          | 335                | 63 (-)         |
| CD3-CD19+ (%)       | 4.6           | 5.5            | 14.2           | 5.7             | 18.3            | n.a.          | 8.5                | 18.4           |
| CD3-CD19+ (/μl)     | 82            | 116            | 92             | 133             | 614             | n.a.          | 103                | 487            |
| CD27+/CD19+ (%)     | 31.4          | 28.6           | 38.5           | 31.0 (+)        | 0.6 (-)         | n.a.          | 2.5 (-)            | 17.3           |
| CD27+/CD19+ (μl)    | 26            | 33             | 35             | 41              | 5               | n.a.          | 3                  | 84             |
| CD27-IgD+/CD19+ (%) | 31.1          | 44.7           | 38.4           | 43.4            | 60.9            | n.a.          | 51.8               | 47.1           |

|                                               |      |      |      |      |      |      |      |      |
|-----------------------------------------------|------|------|------|------|------|------|------|------|
| CD27-IgD <sup>+</sup> /CD19 <sup>+</sup> (μl) | 25   | 52   | 35   | 46   | 373  | n.a. | 53   | 229  |
| CD27-IgD <sup>+</sup> /CD19 <sup>+</sup> (%)  | 37.5 | 26.7 | 23.1 | 25.6 | 38.5 | n.a. | 45.7 | 35.6 |
| CD27-IgD <sup>-</sup> /CD19 <sup>+</sup> (μl) | 31   | 31   | 22   | 34   | 236  | n.a. | 47   | 172  |

n.a., not assessed; (+) above reference value; (-) below reference value

|                                          | <b>K1-I.1</b> | <b>K1-II.2</b> | <b>K1-II.3</b> | <b>K1-III.1</b> | <b>K1-III.3</b>  | <b>K2-I.1</b> | <b>K2-II.1</b>   | <b>K3-II.1</b> |
|------------------------------------------|---------------|----------------|----------------|-----------------|------------------|---------------|------------------|----------------|
| IgD (mg/dl)                              | <0.6          | <0.6           | <0.7           | 1.0             | <0.7             | <0.6          | <0.6             | n.a.           |
| IgM (mg/dl)                              | 94            | 54             | 43             | 70              | 38 (-)           | 112           | 181              | 65             |
| IgA (mg/dl)                              | 159           | 80             | 106            | 74              | 6 (-)            | 440           | 166              | 120            |
| IgG (mg/dl)                              | 1054          | 993            | 1162           | 1040            | 280 (-)          | 1610          | 1054             | 841            |
| IgG1 (mg/dl)                             | 468           | 423            | 586            | 748             | 110              | n.a.          | 547              | n.a.           |
| IgG2 (mg/dl)                             | 428           | 477            | 499            | 247             | 64               | n.a.          | 239              | n.a.           |
| IgG3 (mg/dl)                             | 83            | 66             | 75             | 51              | 107              | n.a.          | 83               | n.a.           |
| IgG4 (mg/dl)                             | 16            | 36             | 28             | 19              | <0.3             | n.a.          | 4.4 (-)          | n.a.           |
| Tetanus-Toxoid<br>IgG Antibody (U/ml)    | 2.78          | 0.94           | 4.54           | 0.32            | 0.04 (-)         | >5.0          | 0.16             | n.a.           |
| Diphtheria-Toxoid<br>IgG Antibody (U/ml) | 0.16          | 0.34           | 0.78           | 0.47            | 0.08 (-)         | 0.59          | 0.05 (-)         | n.a.           |
| Mumps Antibody<br>IgG Antibody (titre)   | 1:4,500       | 1:1,000        | 1:2,500        | 1:740           | <1:230 (-)       | 1:920         | 1:1,100          | n.a.           |
| Measles Antibody<br>IgG Antibody (mU/ml) | 10.000        | 8,200          | 3,400          | 540             | 150 (borderline) | 9.800         | 230 (borderline) | n.a.           |
| Rubella Antibody<br>IgG Antibody (U/ml)  | 150           | 150            | 54             | 40              | 15               | 23            | 7                | n.a.           |

|                                            |       |     |     |     |         |     |     |      |
|--------------------------------------------|-------|-----|-----|-----|---------|-----|-----|------|
| Varicella Antibody<br>IgG Antibody (mU/ml) | 1.400 | 760 | 410 | 220 | <50 (-) | 250 | 670 | n.a. |
|--------------------------------------------|-------|-----|-----|-----|---------|-----|-----|------|

n.a., not assessed; (+) above reference value; (-) below reference value

Table S2 – Sorted cell numbers used for IgH sequencing and obtained sequences

| <b>Individuum</b> | <b>Sorted Population</b> | <b>Number of sorted cells</b> | <b>Overall reads</b> | <b>Number of unique CDR3</b> | <b>IgM (%)</b> | <b>IgD (%)</b> | <b>IgA/IgG/IgE (%)</b> |
|-------------------|--------------------------|-------------------------------|----------------------|------------------------------|----------------|----------------|------------------------|
| K1-III.1          | IgD+                     | 1.9*10 <sup>4</sup>           | 288802               | 9407                         | 72.22          | 27.76          | 0.00                   |
|                   | IgD-                     | 1.6*10 <sup>4</sup>           | 285303               | 14743                        | 69.12          | 30.21          | 0.66                   |
| K1-II.3           | IgD+                     | 1.1*10 <sup>5</sup>           | 102283               | 24043                        | 76.59          | 23.39          | 0.02                   |
|                   | IgD-                     | 6.8*10 <sup>4</sup>           | 101893               | 15521                        | 80.99          | 18.91          | 0.10                   |
| K2-I.1            | IgD+                     | 6.3*10 <sup>4</sup>           | 98168                | 14346                        | 72.61          | 27.38          | 0.02                   |
|                   | IgD-                     | 5.3*10 <sup>4</sup>           | 104427               | 10973                        | 96.83          | 3.17           | 0.01                   |
| K3-II.1           | IgD+                     | 3.5*10 <sup>5</sup>           | 102442               | 48866                        | 81.53          | 18.45          | 0.01                   |
|                   | IgD-                     | 2.7*10 <sup>5</sup>           | 92160                | 36435                        | 90.83          | 9.11           | 0.05                   |

IgD<sup>+</sup> population: CD19<sup>+</sup>CD27<sup>-</sup>CD10<sup>+</sup>IgM<sup>+</sup> IgD<sup>+</sup>; IgD<sup>-</sup> population: CD19<sup>+</sup>CD27<sup>-</sup>CD10<sup>+</sup>IgM<sup>+</sup> IgD<sup>-</sup>

### 3 Supplementary Figures

| <b>A</b>             | <b>IgD</b>                |
|----------------------|---------------------------|
| <b>Human</b>         | APTKA <b>P</b> DVFPIISGCR |
| <b>Chimpanzee</b>    | APTKA <b>P</b> DVFPIISGCR |
| <b>Mouse</b>         | GDKKE <b>P</b> DMFLLSECKA |
| <b>Rat</b>           | APEKE <b>P</b> DLFLSSECKA |
| <b>Pig</b>           | ERQSA <b>P</b> SLFPLVSCVS |
| <b>Sheep</b>         | ESESH <b>P</b> KVFPLVSCVS |
| <b>Platypus</b>      | VGQRA <b>P</b> EVYPLYAGCG |
| <b>Rainbow trout</b> | VQRVI <b>P</b> PNITLYPLWE |
| <b>Salmon</b>        | VQRVI <b>P</b> PNITLYPLWE |
| <b>Dog</b>           | ASRES <b>L</b> LLPLVSGCK  |
| <b>Horse</b>         | SLEDTAVI <b>P</b> LFSECK  |
| <b>Cow</b>           | EGESH <b>L</b> RVFPLVSCVS |

  

| <b>B</b>    | <b>Human</b>              |
|-------------|---------------------------|
| <b>IgD</b>  | APTKA <b>P</b> DVFPIISGCR |
| <b>IgM</b>  | GSASA <b>P</b> TLFPLVSCE  |
| <b>IgG1</b> | ASTKG <b>P</b> SVFPLAPSSK |
| <b>IgG2</b> | ASTKG <b>P</b> SVFPLAPCSR |
| <b>IgG3</b> | ASTKG <b>P</b> SVFPLAPCSR |
| <b>IgG4</b> | ASTKG <b>P</b> SVFPLAPCSR |
| <b>IgA1</b> | ASPTS <b>P</b> KVFPLSLCST |
| <b>IgA2</b> | ASPTS <b>P</b> KVFPLSLDST |
| <b>IgE</b>  | ASTQS <b>P</b> SVFPLTRCK  |

Figure S1 – Evolutionary conservation of IgD

Alignment (A) of IgD amino acid sequences between different species and (B) of different Ig isotypes in humans. The amino acid position 6 is highlighted in grey.

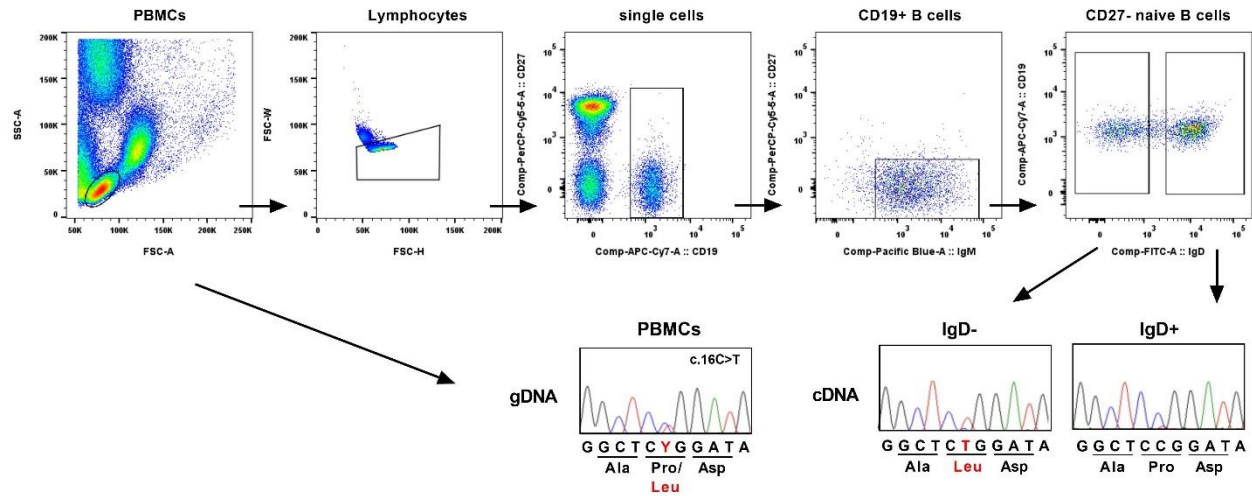

Figure S2 – Usage of different *IGHD* alleles in IgD<sup>+</sup> and IgD<sup>-</sup> naïve B cell populations

Dot plots showing the gating strategy for sorting IgD<sup>+</sup> and IgD<sup>-</sup> CD19<sup>+</sup>CD27-IgM<sup>+</sup> naïve B cells from individual K1-III.3. Chromatograms showing sequencing results of *IGHD* exon 1 amplified from cDNA of sorted B cell populations or genomic DNA (gDNA) from unsorted PBMCs.

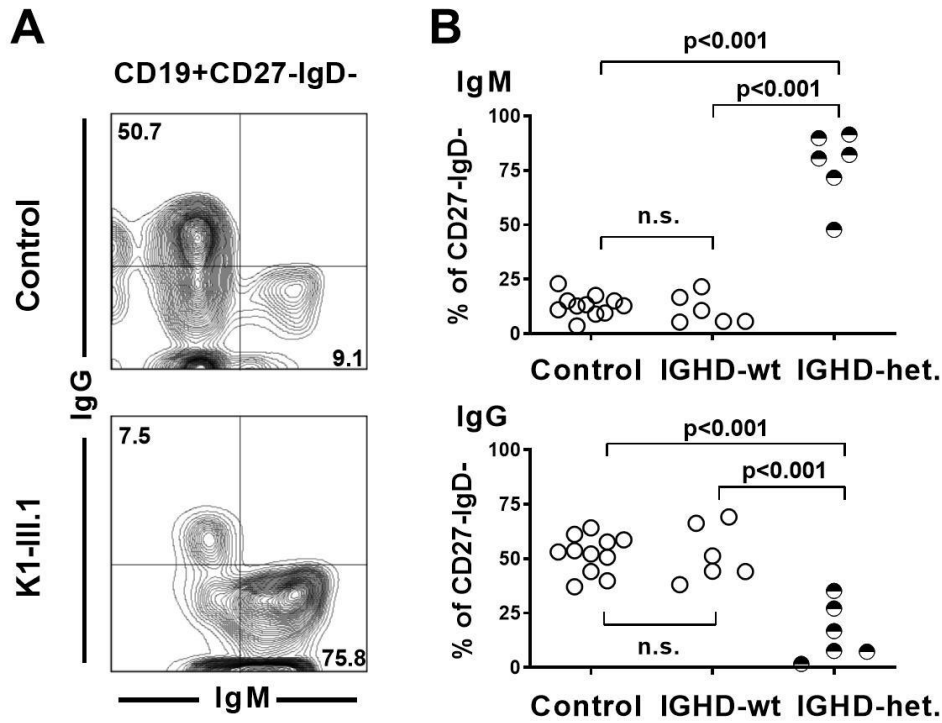

Figure S3 – IgD-CD27- B cells in heterozygous *IGHD* variant carriers are naïve B cells

(A) Representative dot plots showing IgG and IgM expression in CD19<sup>+</sup>CD27<sup>-</sup>IgD<sup>-</sup> B cells from an individual carrying an *IGHD* variant and an unrelated control individual. (B) Frequencies of IgM- or IgG-positive cells within CD19<sup>+</sup>CD27<sup>-</sup>IgD<sup>-</sup> B cells from individuals carrying a heterozygous *IGHD* variant (IGHD-het.), their family members without *IGHD* variant (IGHD-wt) and unrelated control individuals.

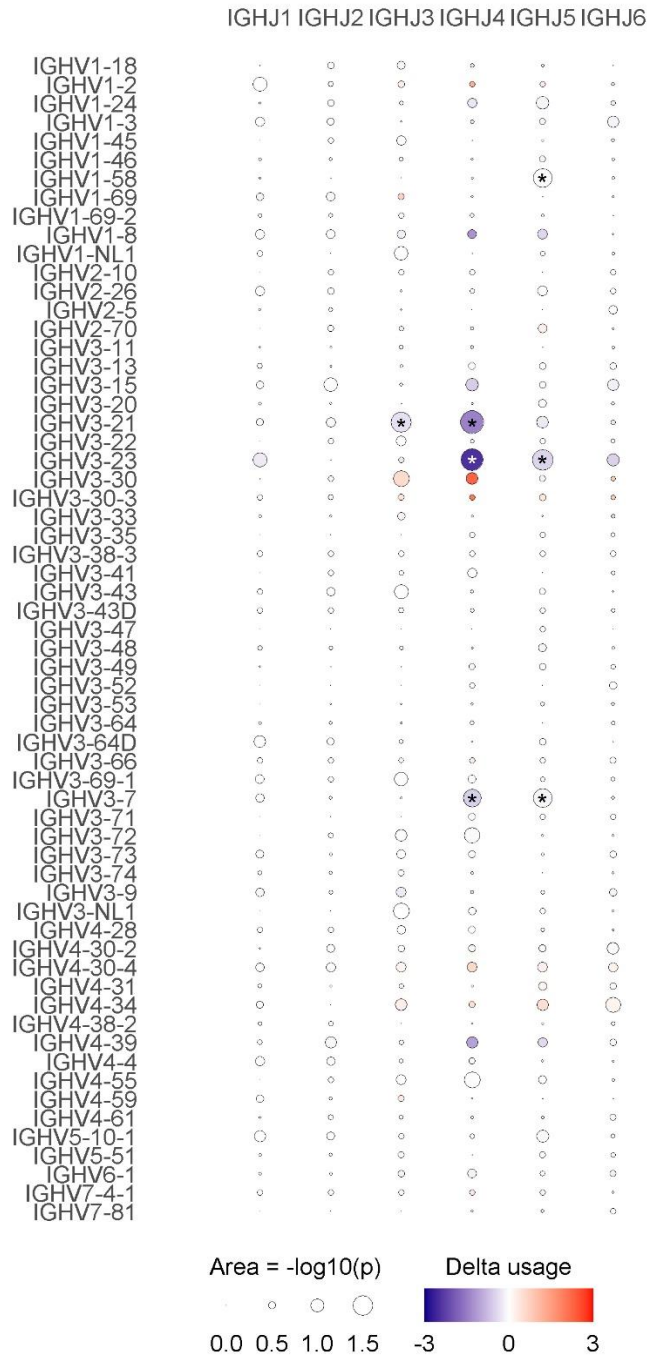

**Figure S4 – Distribution of  $V_H$ - $J_H$  rearrangements in IgD<sup>+</sup> and IgD<sup>-</sup> naïve B cell populations**

Differential usage of distinct  $V_H$ - $J_H$  rearrangements compared between IgD<sup>+</sup> and IgD<sup>-</sup> naïve B cell populations is shown from four individual donors. Mean difference is indicated by color and p values determined by paired t-test are indicated by area of the circles (\* p<0.05).



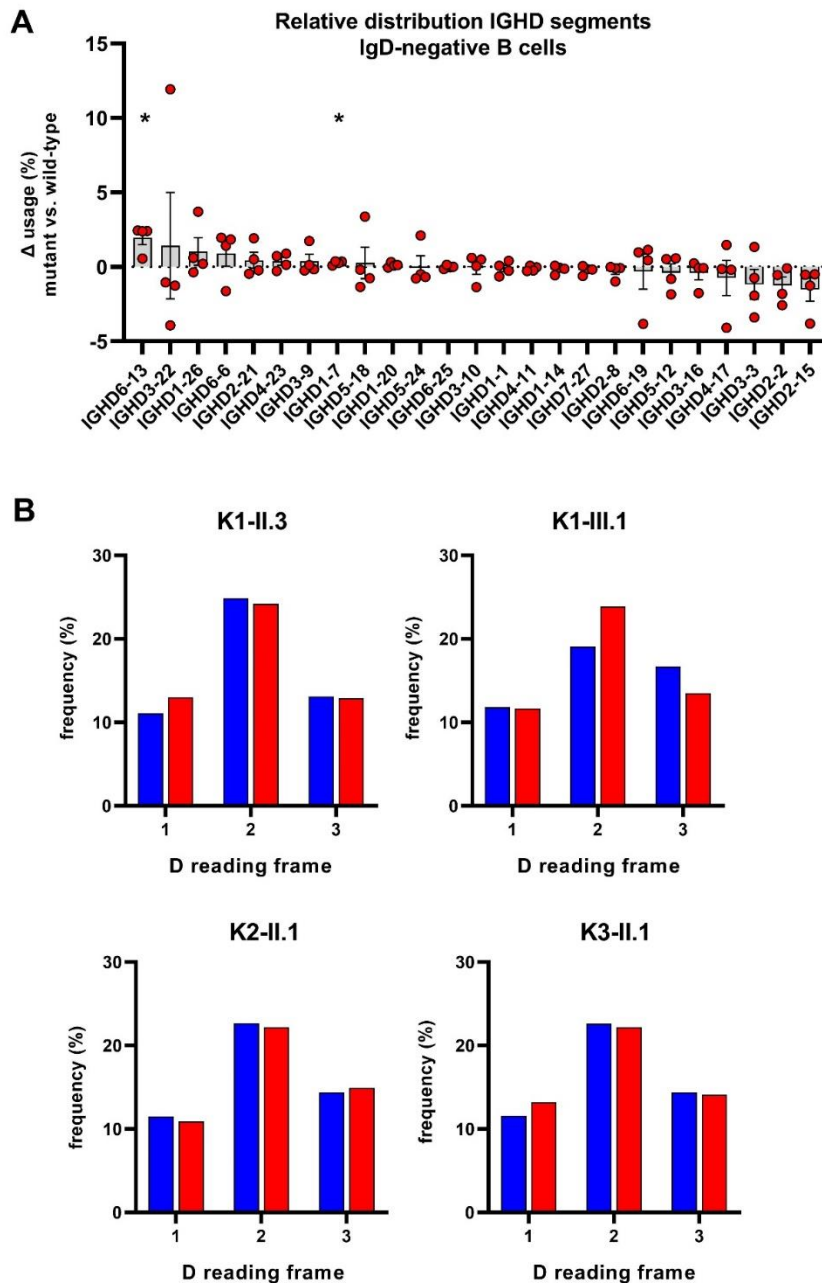

Figure S5 – D<sub>H</sub> segments and D<sub>H</sub> reading frame

(A) Distribution of different D<sub>H</sub> segments used in CD19<sup>+</sup>CD27<sup>-</sup>CD21<sup>+</sup>CD10<sup>-</sup>IgM<sup>+</sup>IgD<sup>-</sup> mature naïve B cells is shown as relative difference compared to the IgD<sup>+</sup> counterpart. Symbols represent the  $\Delta$  frequency IgD<sup>-</sup>/mutant versus IgD<sup>+</sup>/wild-type from individual samples and bars the mean  $\pm$  SEM. D<sub>H</sub> segments are ordered on the x-axis according to their mean relative difference. (B) The frequency of the D reading frame used in IgD<sup>+</sup> (blue) and IgD<sup>-</sup> (red) B cell subsets is shown for each individual.

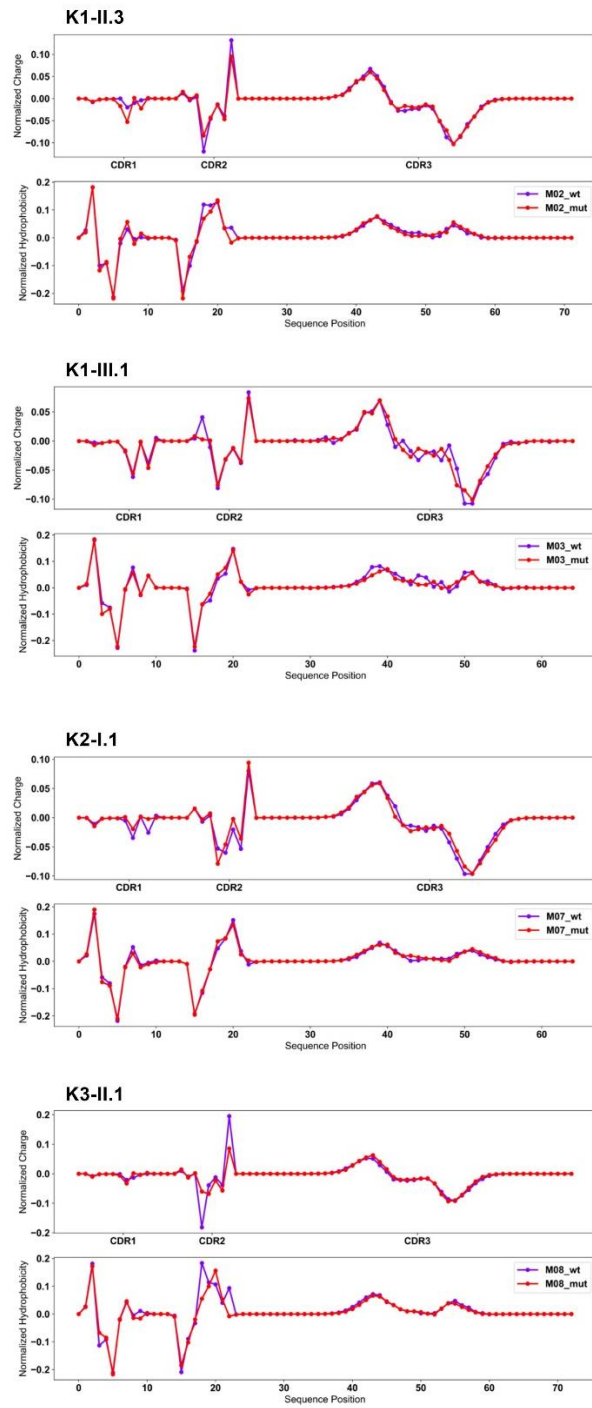

Figure S6 – Position sensitive IGH CDR properties of IgD<sup>+</sup> and IgD<sup>-</sup> naive B cell populations

Position sensitive analysis of normalized charge and hydrophobicity in CDRs of IGH sequences from IgD<sup>+</sup> (blue line) and IgD<sup>-</sup> (red line) naive B cells. Position sensitive properties are shown as analyzed by AIMS for each patient separately.

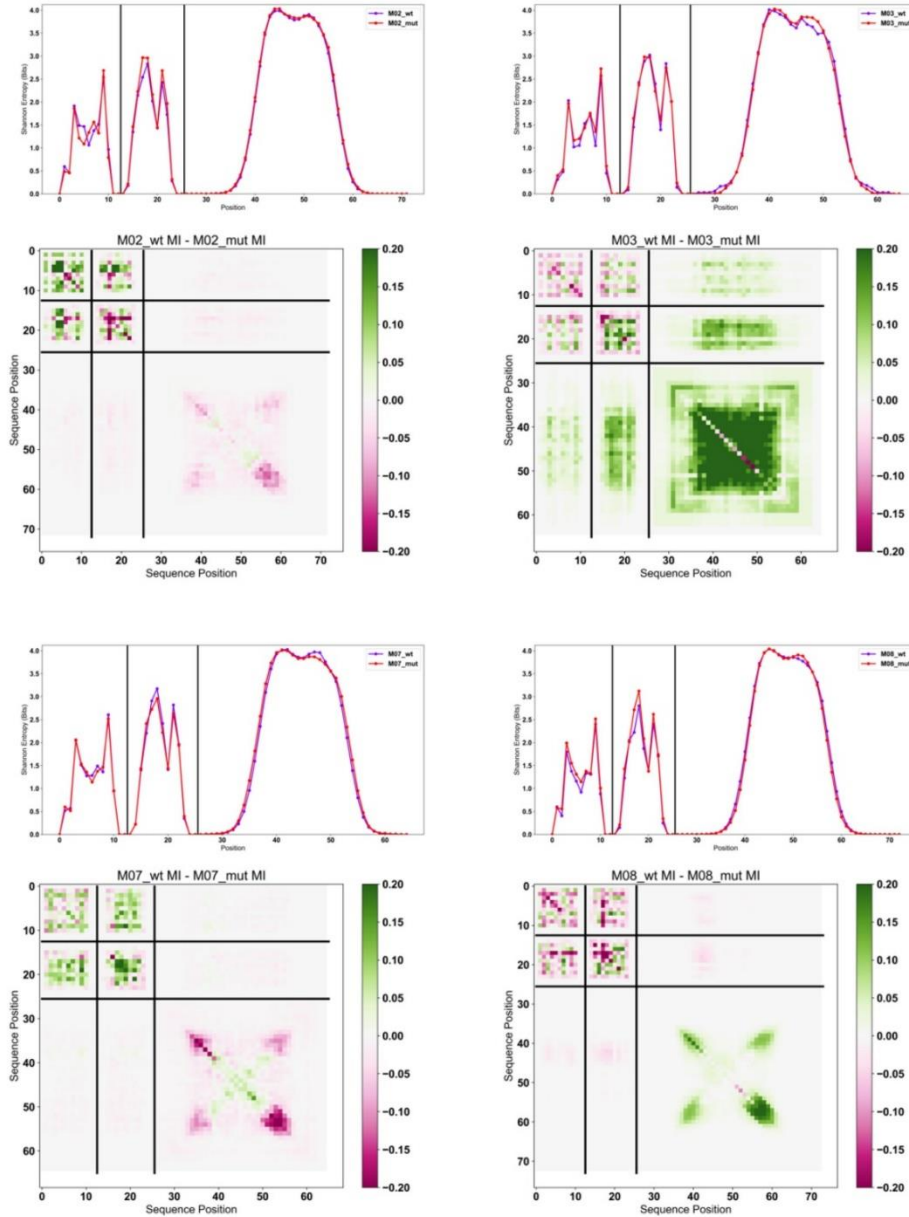

Figure S7 –Shannon entropy and mutual information difference of the IgH sequences between IgD<sup>+</sup> and IgD<sup>-</sup> naïve B cells

Position sensitive analysis of Shannon entropy in CDRs of IGH sequences from IgD<sup>+</sup> (blue line) and IgD<sup>-</sup> (red line) naïve B cells (upper panels). Differences in mutual information of IgH sequences were compared between IgD<sup>+</sup> and IgD<sup>-</sup> naïve B cells for each individual donor (lower panels). Individual rows within the squares represent the given condition and columns the location of the calculated mutual information. Green is indicating a higher mutual information in the IgD<sup>+</sup> population and purple in the IgD<sup>-</sup> population.
